# Supplementary material
Source: PubMed Central journal article supplement (PMC4523082)
Supplement: NIHMS703509-supplement-Supplemental_materials.pdf [file NIHMS703509-supplement-Supplemental_materials.pdf]

**Supplementary Table 1. Data Sources**

| Data                                                          | Source                                                                                                                                                                                                                                                                                                                                                                                                                                                                                                                                                                                     |
|---------------------------------------------------------------|--------------------------------------------------------------------------------------------------------------------------------------------------------------------------------------------------------------------------------------------------------------------------------------------------------------------------------------------------------------------------------------------------------------------------------------------------------------------------------------------------------------------------------------------------------------------------------------------|
| Yeast DNase I footprints <sup>51</sup>                        | <a href="http://downloads.yeastgenome.org/published_datasets/Hesselberth_h_2009_PMIID_19305407/track_files/Hesselberth_2009_DNaseI_hypersensitive_sites_V64.bed">http://downloads.yeastgenome.org/published_datasets/Hesselberth_h_2009_PMIID_19305407/track_files/Hesselberth_2009_DNaseI_hypersensitive_sites_V64.bed</a>                                                                                                                                                                                                                                                                |
| OF sequencing <sup>17</sup>                                   | GEO:GSM835651, GEO:GSM835650 <sup>a</sup><br><a href="http://www.ncbi.nlm.nih.gov/geo/">http://www.ncbi.nlm.nih.gov/geo/</a>                                                                                                                                                                                                                                                                                                                                                                                                                                                               |
| Replication timing data <sup>36</sup>                         | <a href="http://www.sciencemag.org/site/feature/data/raghu1064351/SmoothedPooledHLData/smoothedpooledHLdata.html">http://www.sciencemag.org/site/feature/data/raghu1064351/SmoothedPooledHLData/smoothedpooledHLdata.html</a>                                                                                                                                                                                                                                                                                                                                                              |
| Gene annotations <sup>61</sup>                                | <a href="http://hgdownload.soe.ucsc.edu/goldenPath/sacCer3/database/sgdGene.txt.gz">http://hgdownload.soe.ucsc.edu/goldenPath/sacCer3/database/sgdGene.txt.gz</a>                                                                                                                                                                                                                                                                                                                                                                                                                          |
| Origins of replication <sup>50</sup>                          | <a href="http://downloads.yeastgenome.org/published_datasets/Eaton_2010_PMIID_20351051/track_files/Eaton_2010_ORC_ACS_V64.bed">http://downloads.yeastgenome.org/published_datasets/Eaton_2010_PMIID_20351051/track_files/Eaton_2010_ORC_ACS_V64.bed</a>                                                                                                                                                                                                                                                                                                                                    |
| Yeast ChIP-exo data (Reb1, Rap1) <sup>55</sup>                | SRA:SRA044886 <sup>b</sup>                                                                                                                                                                                                                                                                                                                                                                                                                                                                                                                                                                 |
| TF binding motifs <sup>57</sup>                               | <a href="http://jaspar.genereg.net/html/DOWNLOAD/JASPAR_CORE/pfm/nonredundant/pfm_all.txt">http://jaspar.genereg.net/html/DOWNLOAD/JASPAR_CORE/pfm/nonredundant/pfm_all.txt</a>                                                                                                                                                                                                                                                                                                                                                                                                            |
| Human DNase I <sup>59</sup>                                   | <a href="ftp://ftp.ebi.ac.uk/pub/databases/ensembl/encode/supplementary/integration_data_jan2011/byDataType/footprints/jan2011/all.footprints.gz">ftp://ftp.ebi.ac.uk/pub/databases/ensembl/encode/supplementary/integration_data_jan2011/byDataType/footprints/jan2011/all.footprints.gz</a><br><a href="ftp://ftp.ebi.ac.uk/pub/databases/ensembl/encode/supplementary/integration_data_jan2011/byDataType/footprints/jan2011/combined.fps.gz">ftp://ftp.ebi.ac.uk/pub/databases/ensembl/encode/supplementary/integration_data_jan2011/byDataType/footprints/jan2011/combined.fps.gz</a> |
| Yeast genomic alignments                                      | <a href="http://hgdownload.soe.ucsc.edu/goldenPath/sacCer3/multiz7way/maf/">http://hgdownload.soe.ucsc.edu/goldenPath/sacCer3/multiz7way/maf/</a>                                                                                                                                                                                                                                                                                                                                                                                                                                          |
| Yeast polymorphism data <sup>53</sup>                         | <a href="ftp://ftp.sanger.ac.uk/pub/users/dmc/yeast/latest/misc.tgz">ftp://ftp.sanger.ac.uk/pub/users/dmc/yeast/latest/misc.tgz</a>                                                                                                                                                                                                                                                                                                                                                                                                                                                        |
| Human ChIP-seq (CREB1, ETS1, MEF2A, NFIC, USF1) <sup>62</sup> | SRA:SRP008797 <sup>b</sup>                                                                                                                                                                                                                                                                                                                                                                                                                                                                                                                                                                 |
| Human ChIP-seq (ELK1, ELK4, IRF1, STAT1, YY1)                 | GEO:GSE31477 <sup>a</sup> , SRA:SRP007993 <sup>b</sup>                                                                                                                                                                                                                                                                                                                                                                                                                                                                                                                                     |
| Human ChIP-seq (CEBPA) <sup>63</sup>                          | SRA:SRP008215 <sup>b</sup>                                                                                                                                                                                                                                                                                                                                                                                                                                                                                                                                                                 |
| Human ChIP-seq (FOXA1) <sup>64-66</sup>                       | SRA:SRP003811, SRA:SRP007486, SRA:SRP006770 <sup>b</sup>                                                                                                                                                                                                                                                                                                                                                                                                                                                                                                                                   |
| Human ChIP-seq (FOXO3) <sup>67</sup>                          | SRA:SRP010705 <sup>b</sup>                                                                                                                                                                                                                                                                                                                                                                                                                                                                                                                                                                 |
| Human ChIP-seq (NFκB) <sup>68</sup>                           | SRA:SRP002125 <sup>b</sup>                                                                                                                                                                                                                                                                                                                                                                                                                                                                                                                                                                 |
| Human ChIP-seq (NFYA) <sup>69</sup>                           | SRA:SRP005174 <sup>b</sup>                                                                                                                                                                                                                                                                                                                                                                                                                                                                                                                                                                 |
| Human ChIP-seq (REST) <sup>70,71</sup>                        | SRA:SRP010385, SRA:SRP017090, SRA:SRP006944 <sup>b</sup>                                                                                                                                                                                                                                                                                                                                                                                                                                                                                                                                   |
| Human ChIP-exo (CTCF) <sup>55</sup>                           | SRA:SRX098245 <sup>b</sup>                                                                                                                                                                                                                                                                                                                                                                                                                                                                                                                                                                 |
| Mammalian GERP scores <sup>41</sup>                           | <a href="http://hgdownload.cse.ucsc.edu/gbdb/hg19/bbi/All_hg19_RS.bw">http://hgdownload.cse.ucsc.edu/gbdb/hg19/bbi/All_hg19_RS.bw</a>                                                                                                                                                                                                                                                                                                                                                                                                                                                      |

<sup>a</sup> GEO: <http://www.ncbi.nlm.nih.gov/geo/>

<sup>b</sup> SRA: <http://www.ncbi.nlm.nih.gov/sra>

Supplementary Table 2. Sequencing data

| Run Name | Genotype <sup>a</sup>          | Treatment <sup>b</sup> | Platform <sup>c</sup> | Mapped Reads |
|----------|--------------------------------|------------------------|-----------------------|--------------|
| run184   | <i>POL</i>                     | Nb.BtsI                | 318                   | 3,701,465    |
| run185   | <i>pol1-L868M</i>              | Nb.BtsI                | 318                   | 4,657,409    |
| run186   | <i>pol1-L868M</i>              | RNase H2               | 318                   | 4,471,771    |
| run190   | <i>POL</i>                     | RNase H2               | 318                   | 2,326,391    |
| run192   | <i>pol1-L868M</i>              | RNase H2               | 318                   | 3,513,472    |
| run195   | <i>POL</i>                     | RNase H2               | 318                   | 3,914,015    |
| run219   | <i>pol3-L612M</i>              | RNase H2               | 318                   | 4,170,543    |
| run220   | <i>pol1-L868M</i>              | RNase H2               | 318                   | 2,991,737    |
| run237   | <i>POL</i>                     | RNase H2               | 318                   | 5,657,073    |
| run238   | <i>pol1-L868M</i>              | RNase H2               | 318                   | 3,515,150    |
| run254   | <i>pol3-L612M</i>              | RNase H2               | 318                   | 2,644,442    |
| run256   | <i>pol2-M644G</i>              | RNase H2               | 318                   | 5,452,706    |
| run258   | <i>pol2-M644L</i>              | RNase H2               | 318                   | 5,309,315    |
| run25    | <i>pol3-L612M</i>              | RNase H2               | P1                    | 51,728,218   |
| run28    | <i>pol2-M644G</i>              | RNase H2               | P1                    | 58,479,674   |
| run29    | <i>pol2-M644L</i>              | RNase H2               | P1                    | 58,669,607   |
| run35    | <i>POL</i>                     | RNase H2               | P1                    | 30,446,944   |
| run36    | <i>pol1-L868M</i>              | RNase H2               | P1                    | 51,060,856   |
| run37    | <i>POL</i> (stat phase)        | RNase H2               | P1                    | 52,949,855   |
| run38    | <i>pol1-L868M</i> (stat phase) | RNase H2               | P1                    | 57,880,810   |

<sup>a</sup> All genotypes are  $\Delta$ *rrh201* with the relevant polymerase mutations indicated

<sup>b</sup> Treatments indicated refer to the endonuclease nicking step in the library preparation

<sup>c</sup> Ion-semiconductor sequencing was performed using Ion PGM 318 chips or Ion Proton PI chips (Life Technologies)

**Supplementary Table 3. *Saccharomyces cerevisiae* strains**

| Name                                    | Strain | Relevant genotype <sup>a</sup>                             | Reference                |
|-----------------------------------------|--------|------------------------------------------------------------|--------------------------|
| wt                                      | SNM8   | <i>POL1 POL2 POL3 RNH201</i>                               | 27                       |
| $\Delta$ rnh201                         | SNM106 | <i>rnh201::hphMX4</i>                                      | 27                       |
| pol1-L868M                              | SNM15  | <i>pol1-L868M</i>                                          | b                        |
| pol1-L868M $\Delta$ rnh201              | YJW13  | <i>pol1-L868M rnh201::hphMX4</i>                           | b                        |
| pol2-M644G                              | SNM70  | <i>pol2-M644G</i>                                          | 27                       |
| pol2-M644G $\Delta$ rnh201              | SNM120 | <i>pol2-M644G rnh201::hphMX4</i>                           | 27                       |
| pol2-M644L                              | SNM82  | <i>pol2-M644L</i>                                          | 27                       |
| pol2-M644L $\Delta$ rnh201              | SNM132 | <i>pol2-M644L rnh201::hphMX4</i>                           | 27                       |
| pol3-L612M                              | SNM11  | <i>pol3-M644L</i>                                          | 30                       |
| pol3-L612M $\Delta$ rnh201              | YJW11  | <i>pol3-M644L rnh201::hphMX4</i>                           | 30                       |
| $\Delta$ rnh201 + ycp1ac111             | MRY46  | <i>rnh201::hphMX4 [ycp1ac111]</i> <sup>c</sup>             | This work, <sup>39</sup> |
| $\Delta$ rnh201 + pRNH201-wt            | MRY47  | <i>rnh201::hphMX4 [pRNH201-wt]</i> <sup>c</sup>            | This work, <sup>39</sup> |
| $\Delta$ rnh201 + pRNH201-sf            | MRY48  | <i>rnh201::hphMX4 [pRNH201-sf]</i> <sup>c</sup>            | This work, <sup>39</sup> |
| pol1-L868M $\Delta$ rnh201 + ycp1ac111  | MRY49  | <i>pol1-L868M rnh201::hphMX4 [ycp1ac111]</i> <sup>d</sup>  | This work, <sup>39</sup> |
| pol1-L868M $\Delta$ rnh201 + pRNH201-wt | MRY50  | <i>pol1-L868M rnh201::hphMX4 [pRNH201-wt]</i> <sup>d</sup> | This work, <sup>39</sup> |
| pol1-L868M $\Delta$ rnh201 + pRNH201-sf | MRY51  | <i>pol1-L868M rnh201::hphMX4 [pRNH201-sf]</i> <sup>d</sup> | This work, <sup>39</sup> |

<sup>a</sup> All strains are isogenic derivatives of strain  $\Delta|(-2)|-7B-YUN1300$  (MAT $\alpha$  CAN1 his7-2 leu2- $\Delta$ ::kanMX ura3- $\Delta$  trp1-289 ade2-1 lys2- $\Delta\Delta$ G2899-2900) and contain a *URA3* reporter knock in (*agp1::URA3-OR1*)<sup>27,30</sup>. All SNM and YJW strains were kindly provided by JS Williams and TA Kunkel (NIEHS).

<sup>b</sup> JS Williams, AR Clausen and TA Kunkel, unpublished

<sup>c</sup> ycp1ac111 (empty vector), pRNH201-wt and pRNH201-sf (ycNPH2-FL2 expressing FLAG-tagged wild type Rnh201p and Rnh201p-P45D-Y219A separation of function mutant respectively)<sup>39</sup> were kindly provided by SM Cerritelli and RJ Crouch (NICHHD), and transformed into SNM106 and maintained on SD-Leu medium

<sup>d</sup> Vectors were transformed into YJW13 and maintained on SD-Leu medium

**Supplementary References**

61. Cherry, J.M. et al. Saccharomyces Genome Database: the genomics resource of budding yeast. *Nucleic Acids Res* **40**, D700-5 (2012).
62. Gertz, J. et al. Distinct properties of cell-type-specific and shared transcription factor binding sites. *Mol Cell* **52**, 25-36 (2013).
63. Trompouki, E. et al. Lineage regulators direct BMP and Wnt pathways to cell-specific programs during differentiation and regeneration. *Cell* **147**, 577-89 (2011).
64. Tan, S.K. et al. AP-2gamma regulates oestrogen receptor-mediated long-range chromatin interaction and gene transcription. *EMBO J* **30**, 2569-81 (2011).
65. Sahu, B. et al. Dual role of FoxA1 in androgen receptor binding to chromatin, androgen signalling and prostate cancer. *EMBO J* **30**, 3962-76 (2011).
66. Tan, P.Y. et al. Integration of regulatory networks by NKX3-1 promotes androgen-dependent prostate cancer survival. *Mol Cell Biol* **32**, 399-414 (2012).
67. Eijkelenboom, A. et al. Genome-wide analysis of FOXO3 mediated transcription regulation through RNA polymerase II profiling. *Mol Syst Biol* **9**, 638 (2013).
68. Kasowski, M. et al. Variation in transcription factor binding among humans. *Science* **328**, 232-5 (2010).
69. Costessi, A. et al. The tumour antigen PRAME is a subunit of a Cul2 ubiquitin ligase and associates with active NFY promoters. *EMBO J* **30**, 3786-98 (2011).
70. Ram, O. et al. Combinatorial patterning of chromatin regulators uncovered by genome-wide location analysis in human cells. *Cell* **147**, 1628-39 (2011).
71. Schoofs, T. et al. DNA methylation changes are a late event in acute promyelocytic leukemia and coincide with loss of transcription factor binding. *Blood* **121**, 178-87 (2013).
